# Supplementary material for: Cryo-electron tomography investigation of serum albumin-camouflaged tobacco mosaic virus nanoparticles
Source: Royal Society of Chemistry journal article supplement (doi:10.1039/c6nr06948g), 2016-12-27
Supplement: c6nr06948g3.pdf [file c6nr06948g3.pdf]

# Electronic Supplementary Information for Cryo-Electron Tomography Investigation of Serum Albumin-Camouflaged Tobacco Mosaic Virus Nanoparticles

*Neetu M. Gulati, <sup>a,b</sup> Andrzej S. Pitek, <sup>c</sup> Nicole F. Steinmetz, <sup>\*c,d,e,f,g</sup> Phoebe L. Stewart<sup>\*a,b</sup>*

<sup>a</sup>Department of Pharmacology, <sup>b</sup>Cleveland Center for Membrane and Structural Biology,  
<sup>c</sup>Department of Biomedical Engineering, <sup>d</sup>Department of Radiology, <sup>e</sup>Department of Materials  
Science and Engineering, <sup>f</sup>Department of Macromolecular Science and Engineering, <sup>g</sup>Case  
Comprehensive Cancer Center, Division of General Medical Sciences-Oncology, Case Western  
Reserve University, Cleveland, Ohio.

*\*Correspondence should be addressed to: [nicole.steinmetz@case.edu](mailto:nicole.steinmetz@case.edu) and [pls47@case.edu](mailto:pls47@case.edu)*

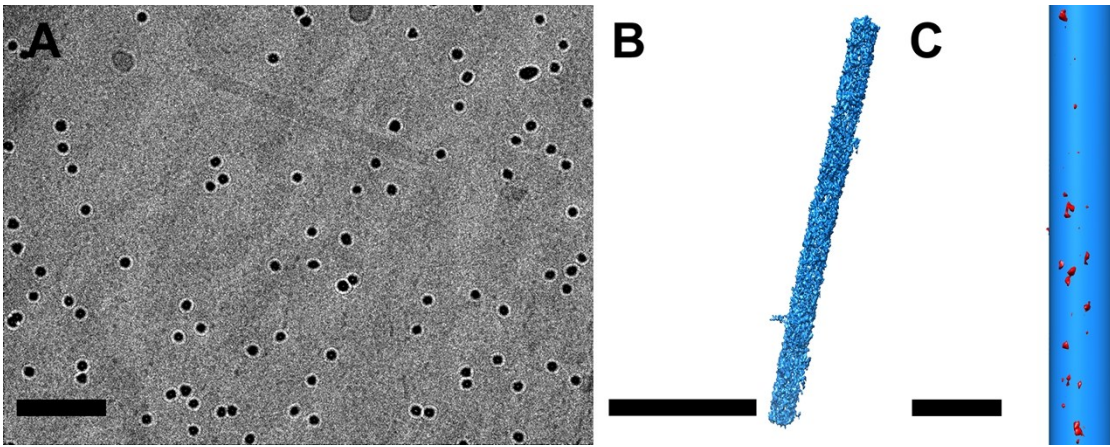

**Fig. S1.** Cryo-electron tomography analysis of naked TMV nanoparticles. (A)  $0^\circ$  tilt image of TMV-lys. (Scale bar = 100 nm). (B) Three-dimensional representation of TMV tomogram. (Scale bar = 100 nm). (C) Single TMV rod (red) with added 300 nm x 18 nm cylinder (blue) indicating that not much density surrounds the bare TMV rod. (Scale bar = 25 nm).

## MOVIE LEGENDS

**Movie S1.** Aligned tilt series of SA-TMV processed using IMOD. Electron dense 10 nm gold fiducials are visible.

**Movie S2.** Z-slices through reconstructed tomogram of SA-TMV processed using IMOD. Electron dense 10 nm gold fiducials are visible.
